# Supplementary material for: Ferrocenyl thiazolidine-2-thione ornamented 1D coordination polymers derived from coinage metal halides and pseudohalides
Source: Royal Society of Chemistry journal article supplement (doi:10.1039/d1ce01147b), 2021-01-01
Supplement: d1ce01147b1.pdf [file d1ce01147b1.pdf]

**Electronic Supporting information**

**Ferrocenyl thiazolidine-2-thione ornamented 1D coordination polymers derived from coinage metal halide and pseudohalide**

Ayushi Singh,<sup>a</sup> Manoj Trivedi,<sup>b</sup> Gabriele Kociok-Köhn,<sup>c</sup> Ashish Kumar Singh,<sup>d</sup> Mohd. Muddassir<sup>e</sup> and Abhinav Kumar<sup>a\*</sup>

## Electronic Supporting information

### Synthesis of thione ligand

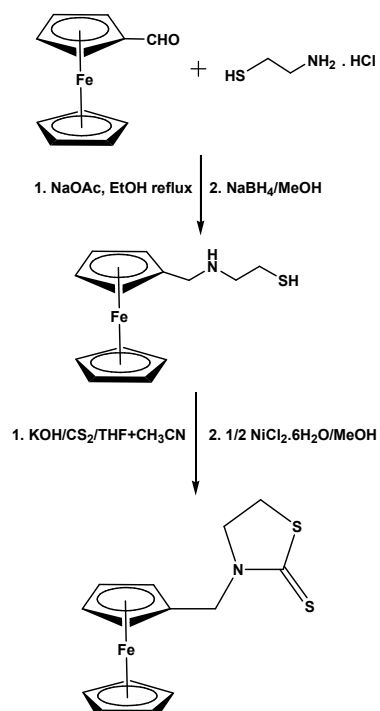

Scheme S1 Synthetic route of thione ligand.

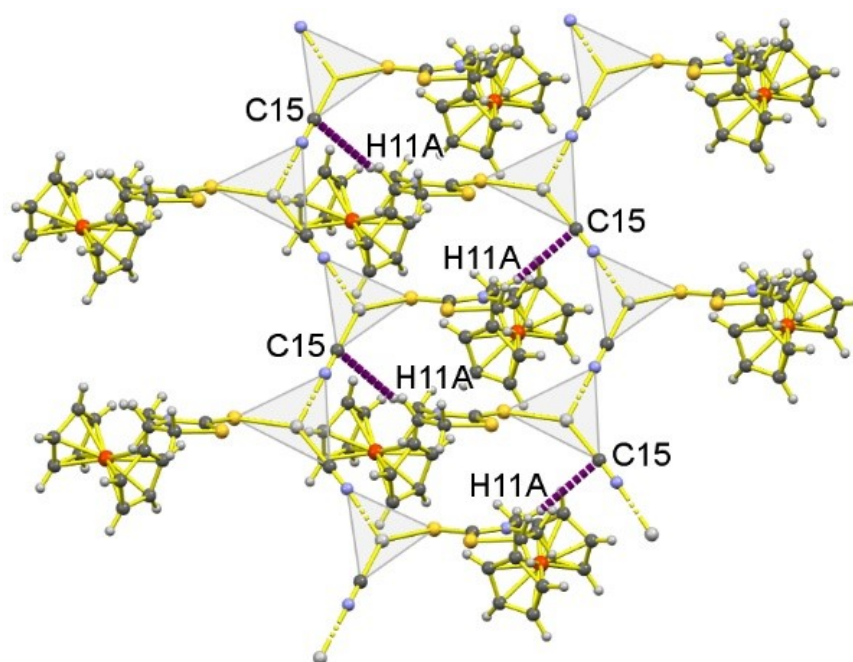

Fig. S1 C-H...C interaction operating in  $\text{FcAgCN}$

## Electronic Supporting information

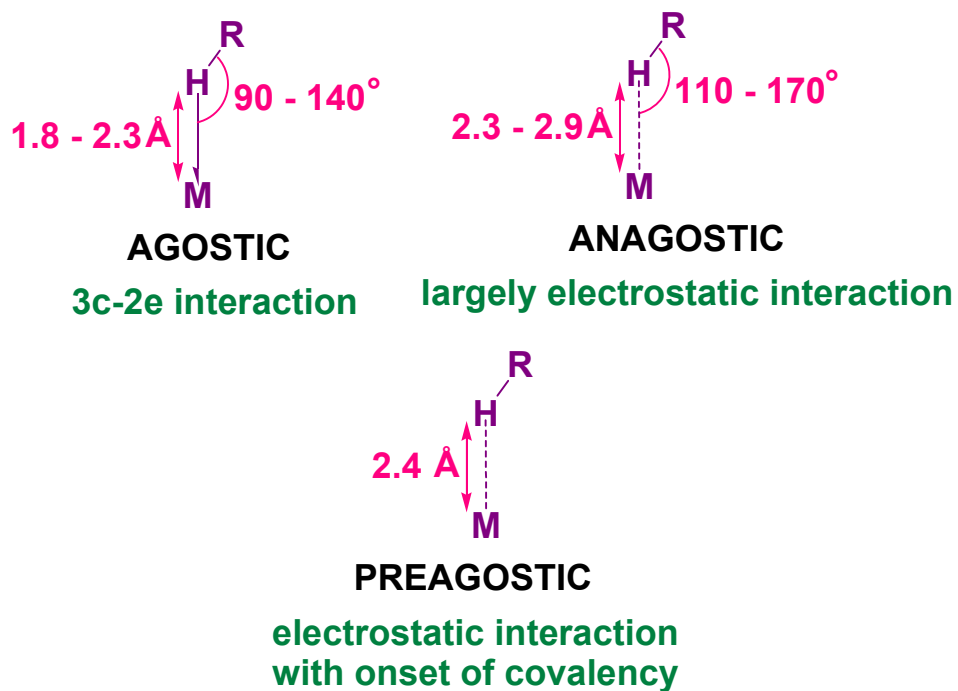

Fig. S2 Structural differences between agostic, anagostic and preagostic interactions.

## Electronic Supporting information

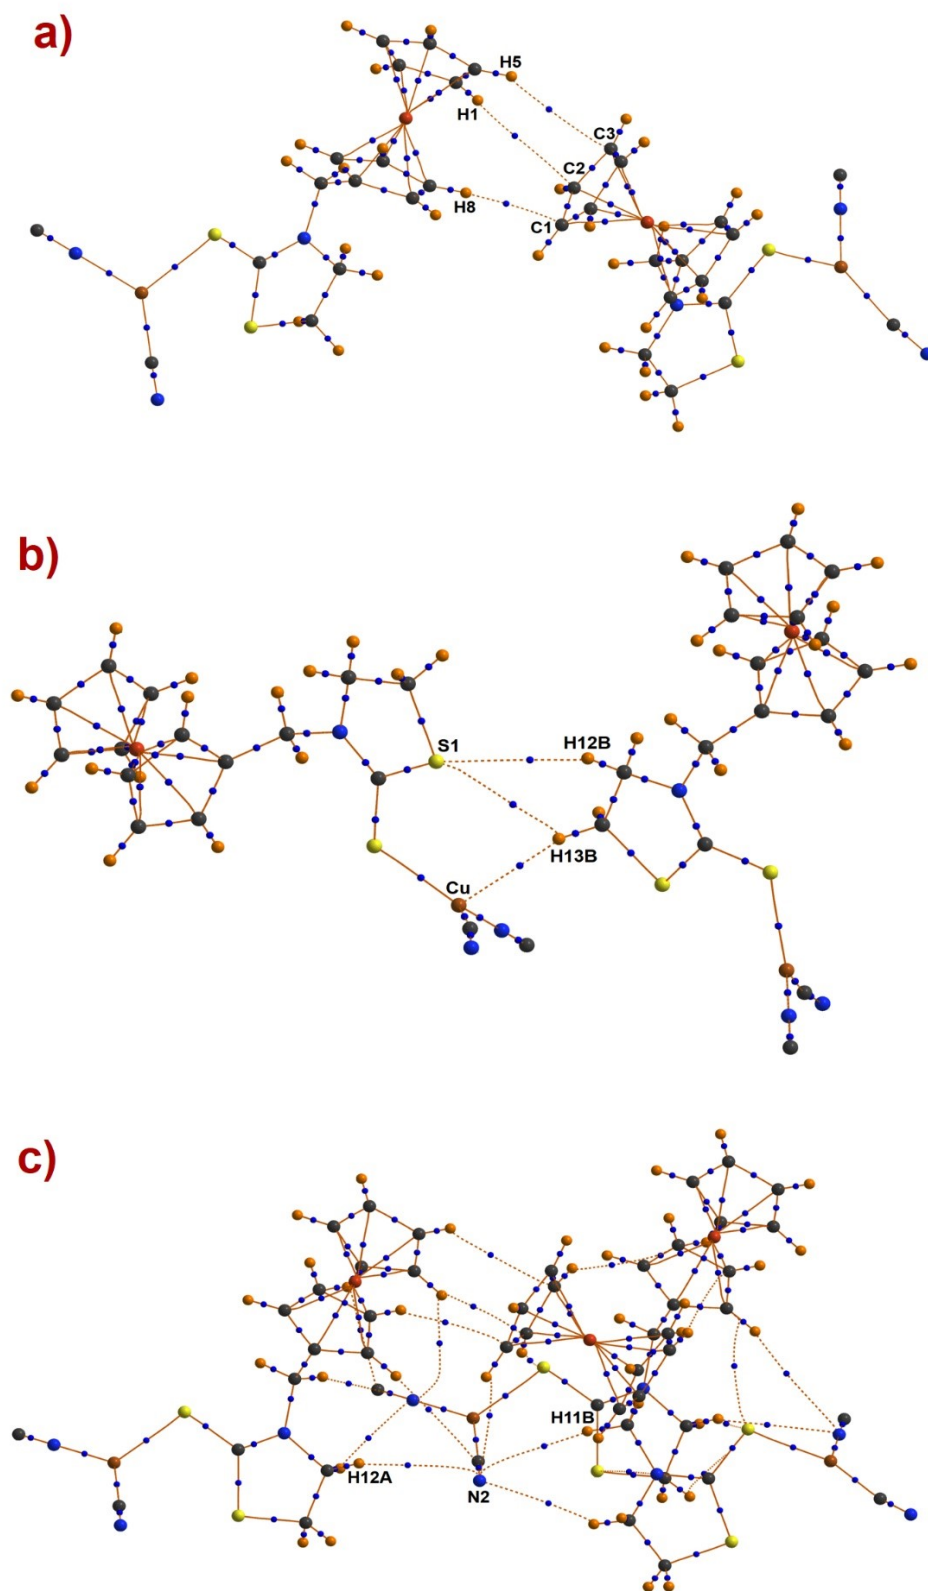

Fig. S3. Molecular graphs of the dimer held by (a) C $\cdots$ H, (b) Cu $\cdots$ H and S $\cdots$ H, (c) N $\cdots$ H interactions in FeCuCN.

## Electronic Supporting information

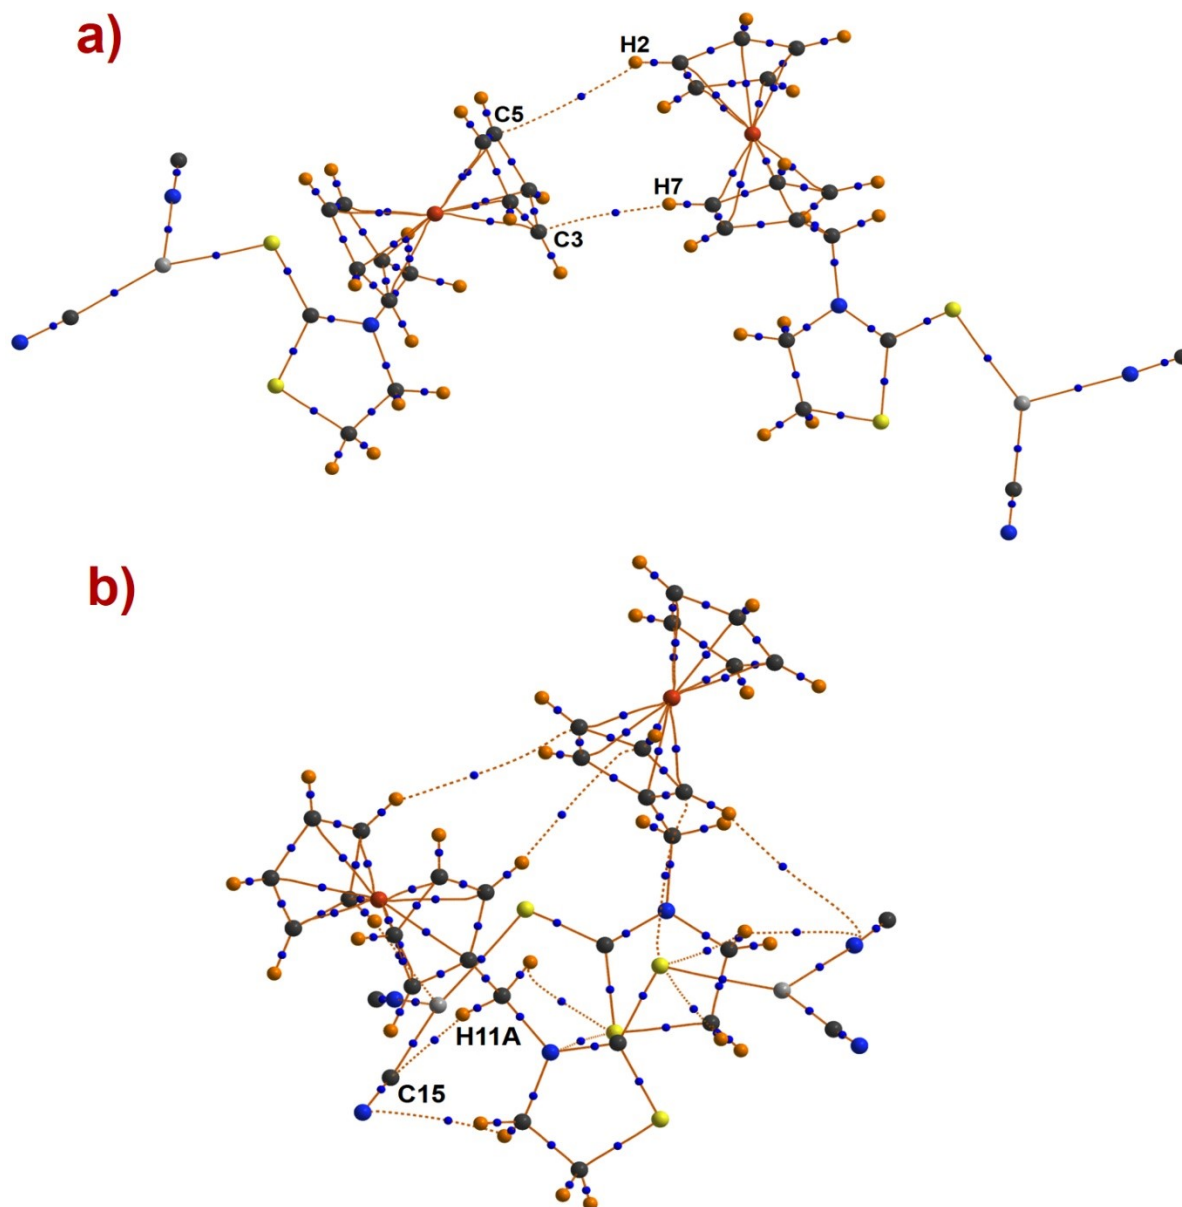

Fig. S4. Molecular graphs of the dimer held by C...H interactions in FcAgCN.

Electronic Supporting information

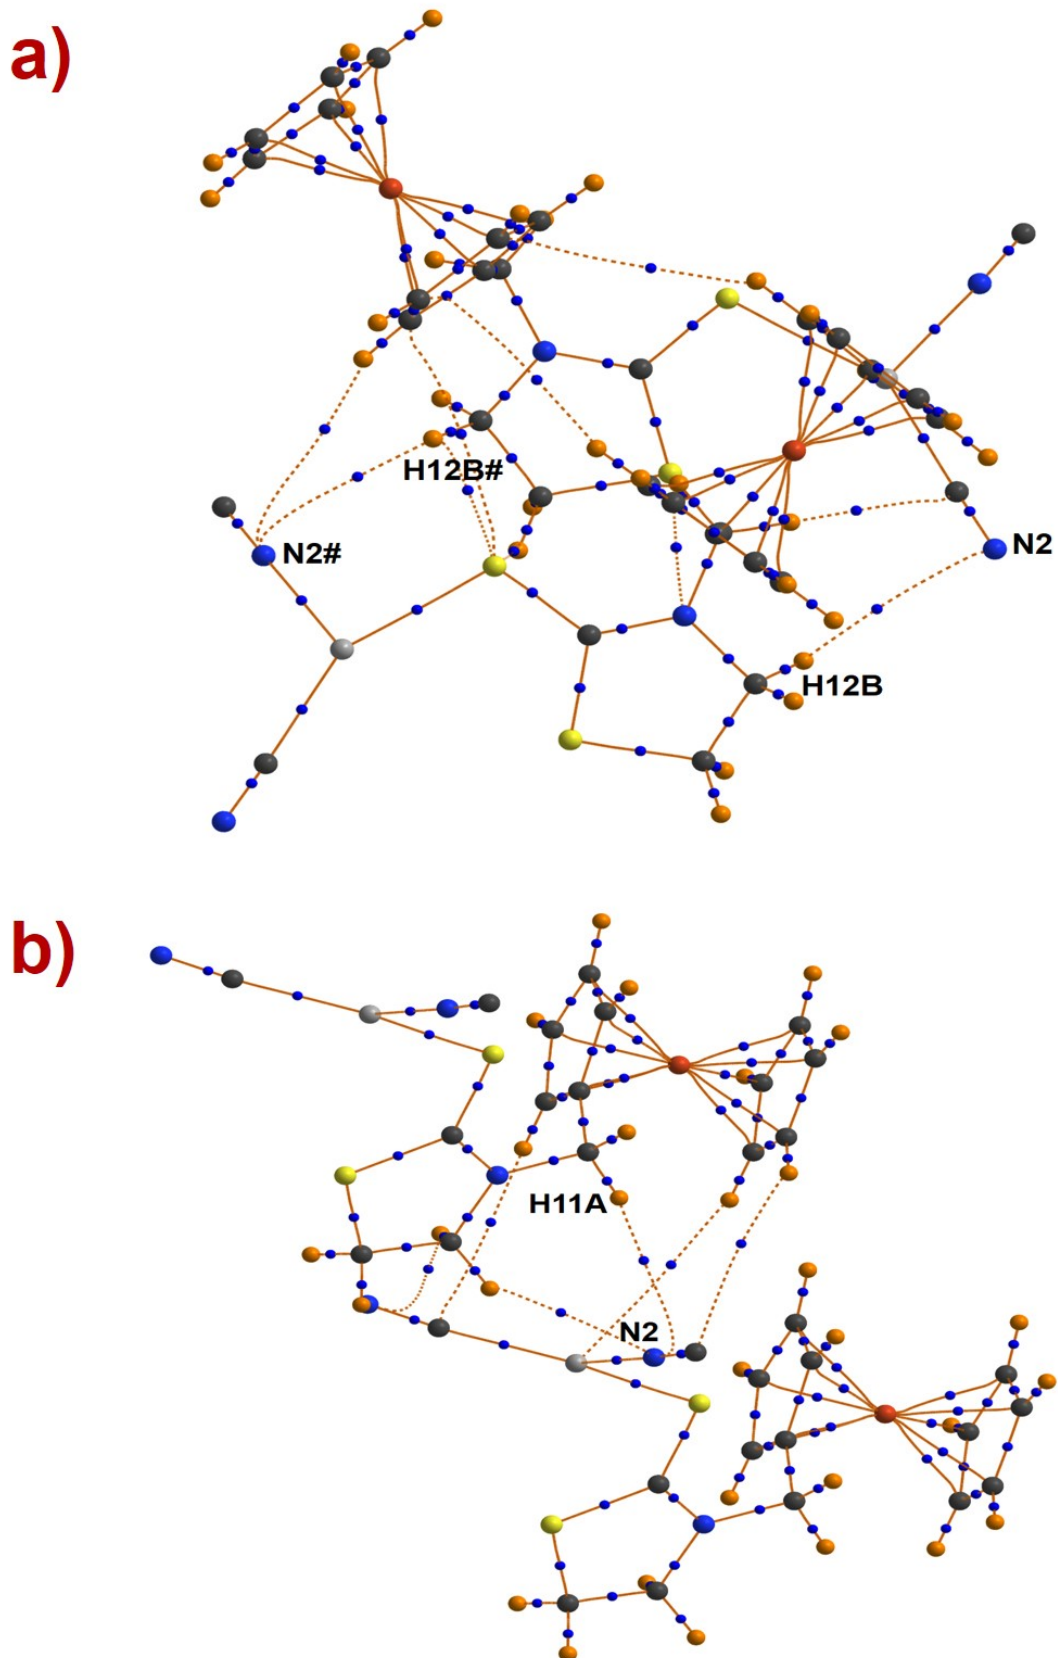

Fig. S5. Molecular graphs of the dimer held by N...H interactions in FcAgCN.

## Electronic Supporting information

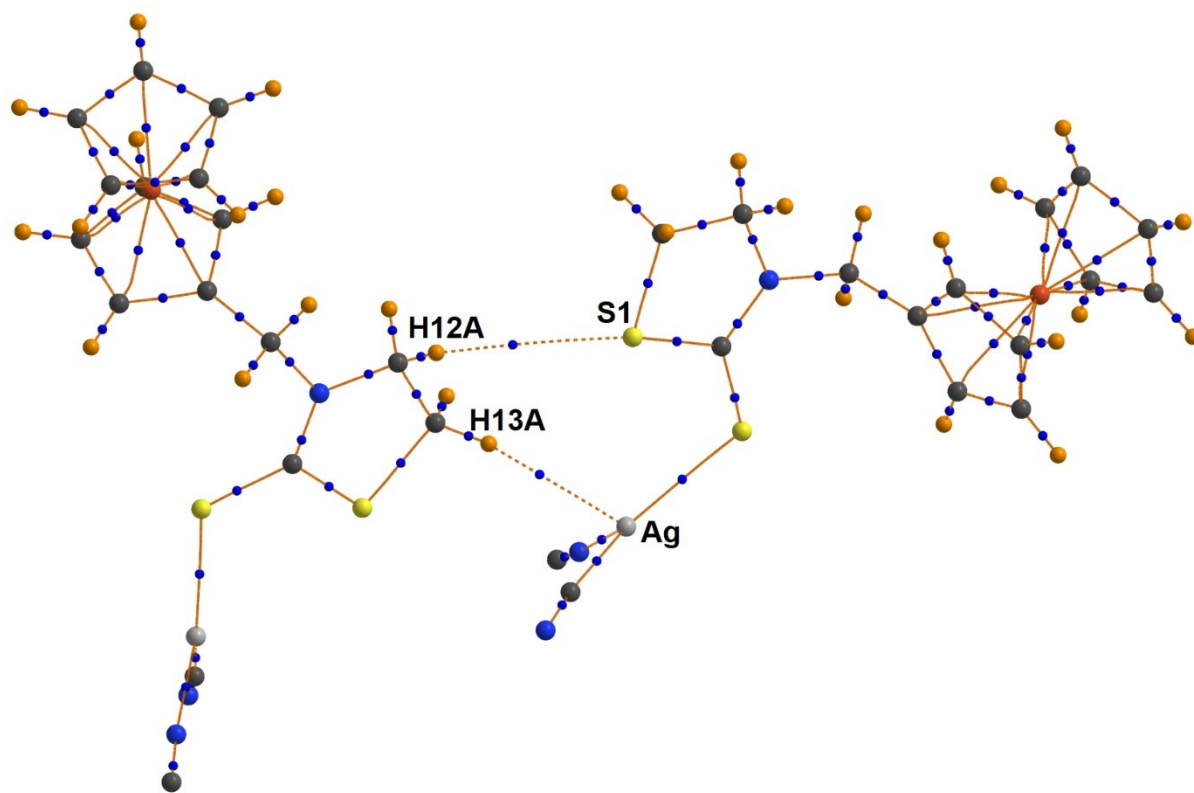

Fig. S6. Molecular graphs of the dimer held by  $\text{Ag}\cdots\text{H}$  and  $\text{S}\cdots\text{H}$  interactions in  $\text{FcAgCN}$ .

## Electronic Supporting information

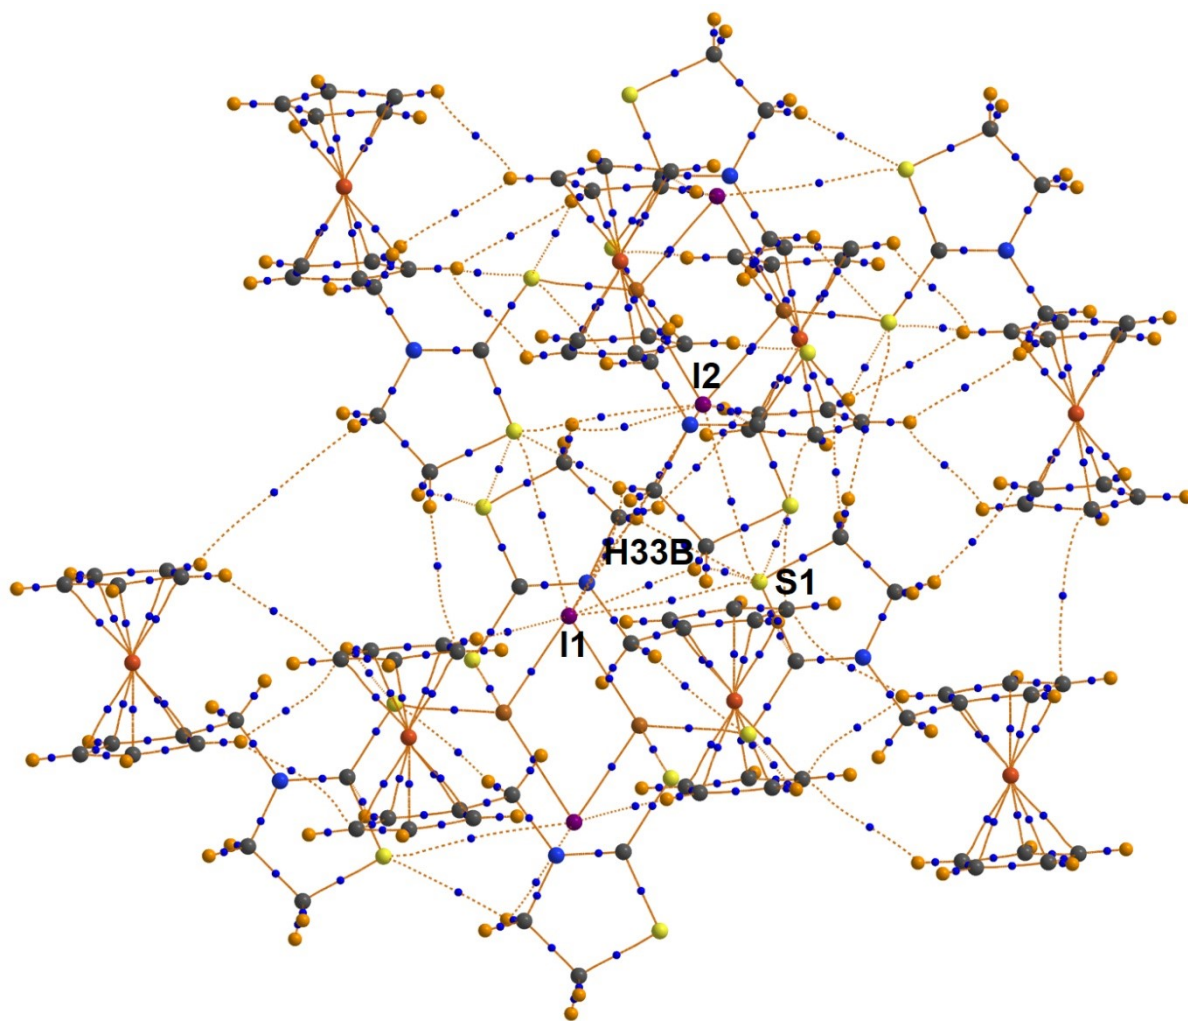

Fig. S7. Molecular graphs of the dimer held by I $\cdots$ S, S $\cdots$ H and I $\cdots$ H interactions in FcCuI.



Electronic Supporting information

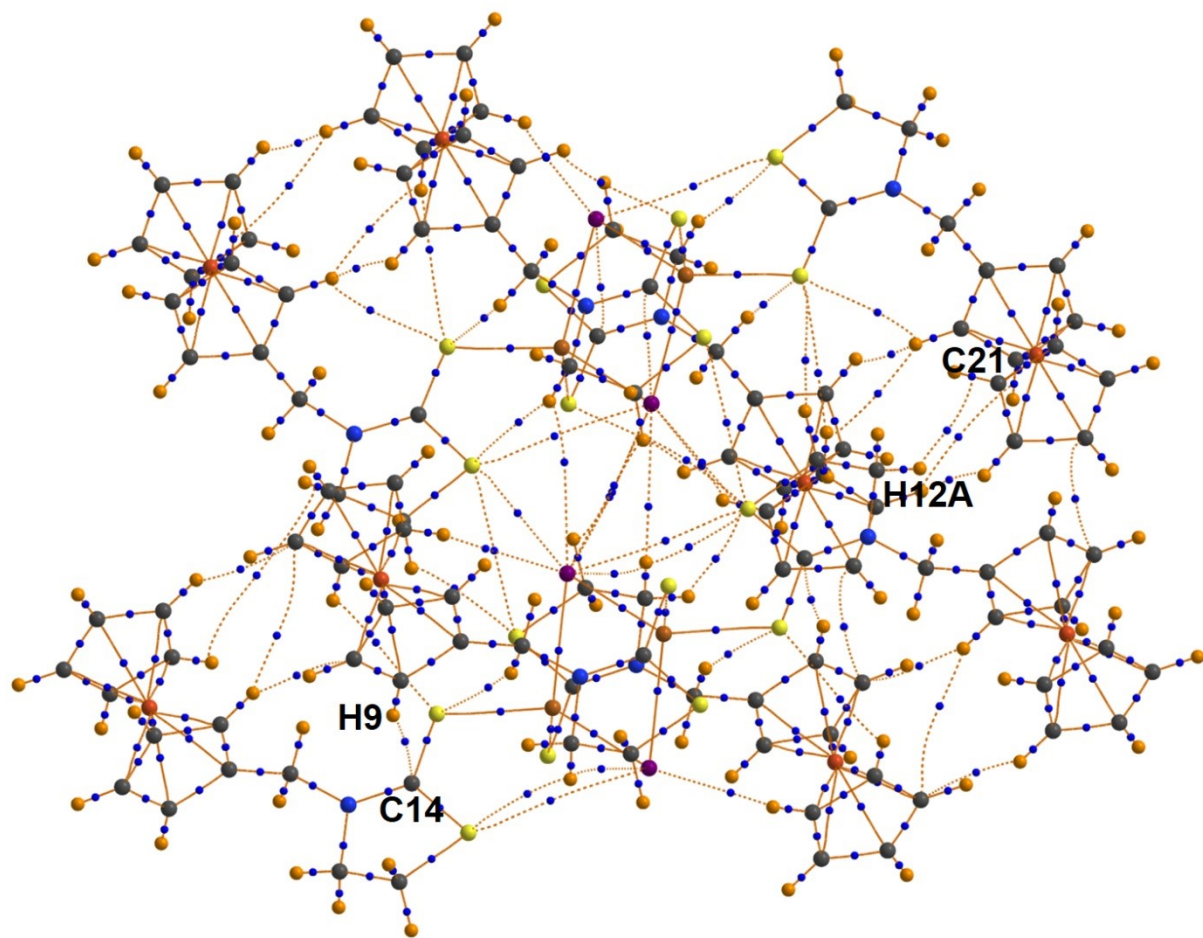

Fig. S8. Molecular graphs of the dimer held by C...H interactions in FcCuI.

## Electronic Supporting information

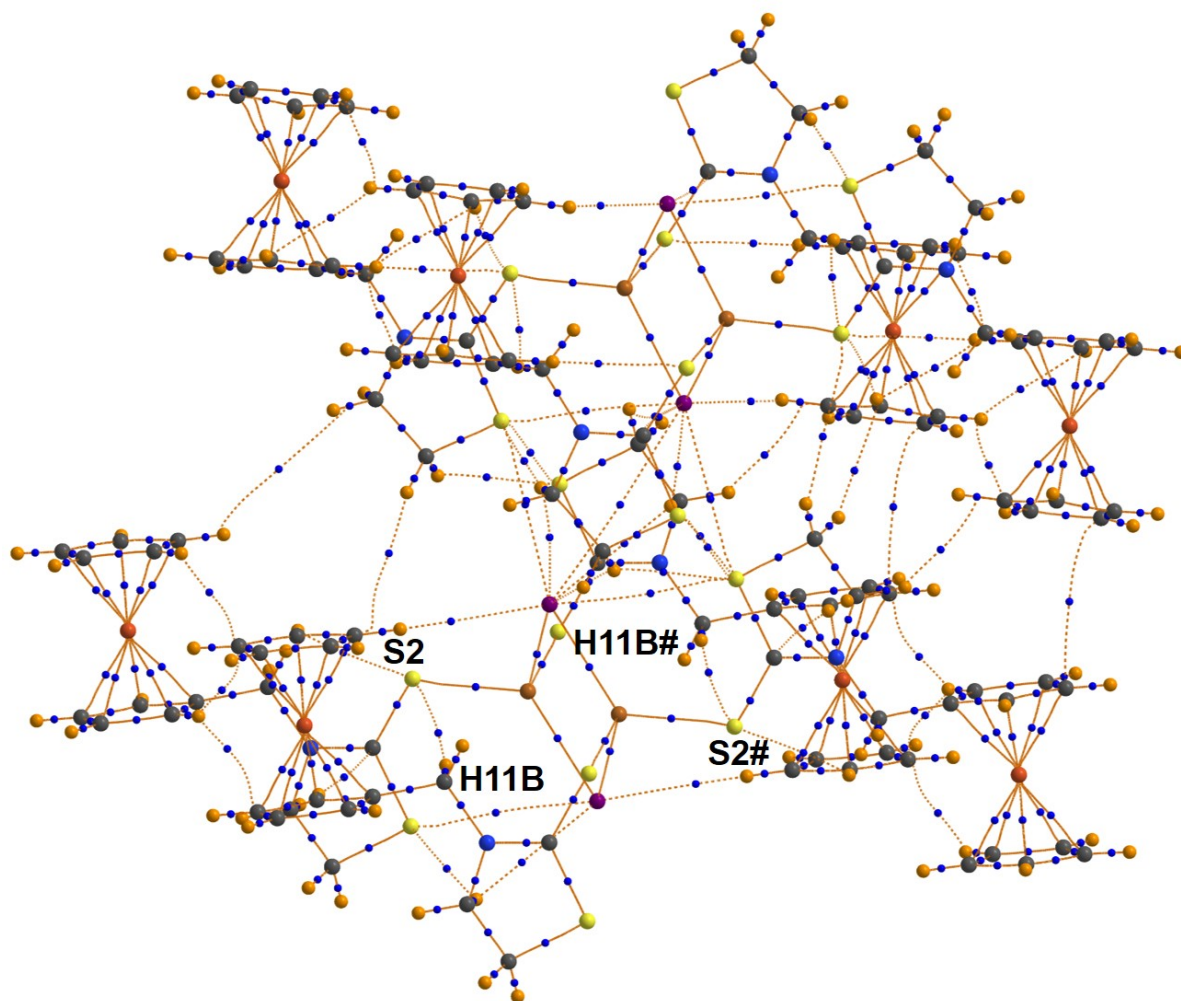

Fig. S9. Molecular graphs of the dimer held by S...H interactions in FeCuI.

## Electronic Supporting information

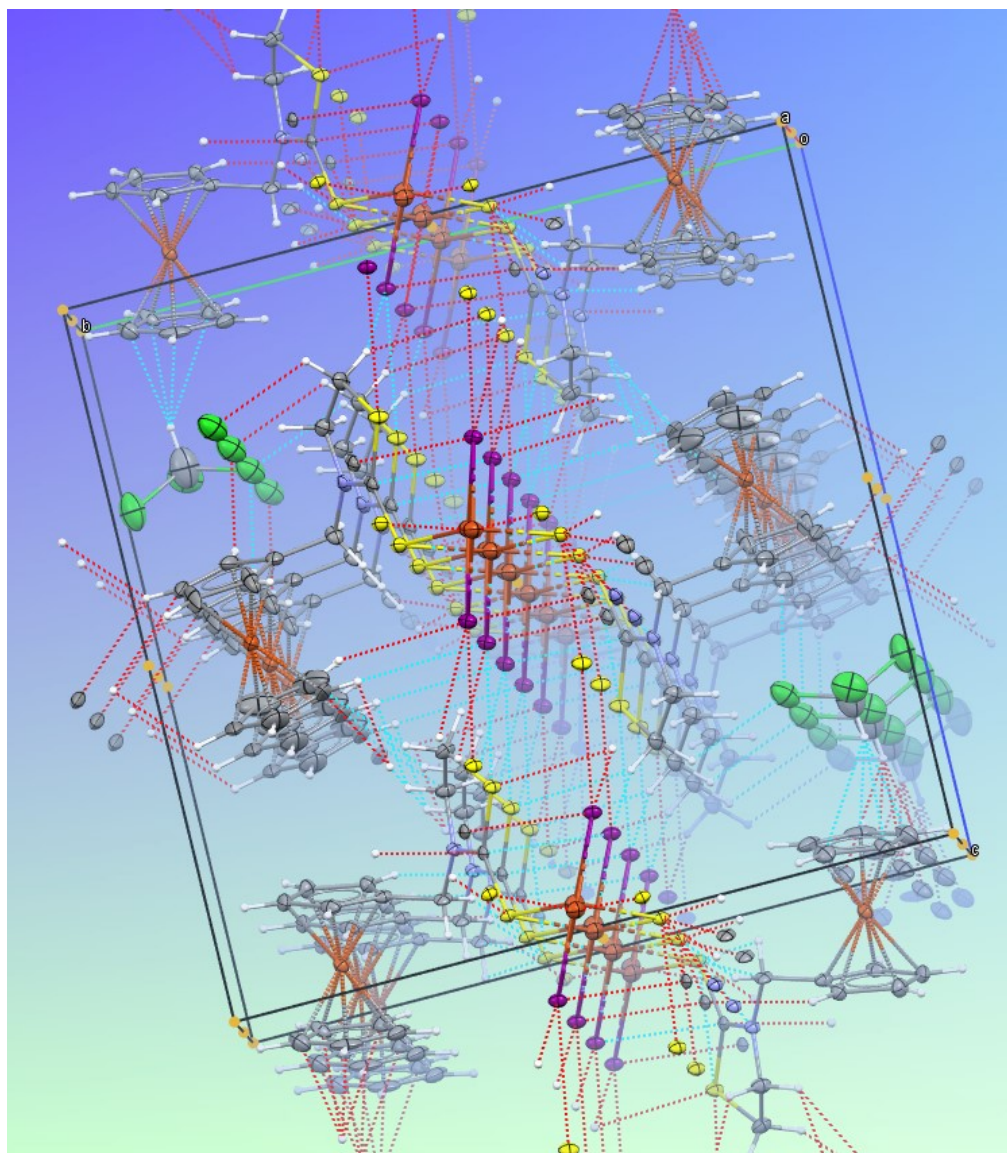

Fig. S10 The positions of co-crystallized solvent molecules in **FcCuI**.

## **Electronic Supporting information**
